# Supplementary material for: The role of kidney transplantation and phosphate binder use in vitamin K status
Source: PubMed Central journal article supplement (PMC6117040; doi:10.1371/journal.pone.0203157), 2018-08-30
Supplement: pone.0203157.s002.pdf [file pone.0203157.s002.pdf]

|                                      | All patients |                                | Non-vitamin K antagonist users |                                | Vitamin K antagonist users |                                |
|--------------------------------------|--------------|--------------------------------|--------------------------------|--------------------------------|----------------------------|--------------------------------|
|                                      | N            | Crude regression coefficient   | N                              | Crude regression coefficient   | N                          | Crude regression coefficient   |
| <b>Hemo- and peritoneal dialysis</b> | 113          | 0.0<br><i>(reference)</i>      | 101                            | 0.0<br><i>(reference)</i>      | 12                         | 0.0<br><i>(reference)</i>      |
| <b>Kidney transplantation</b>        | 36           | -0.64<br><i>(-0.91; -0.36)</i> | 32                             | -0.64<br><i>(-0.89; -0.39)</i> | 4                          | -0.66<br><i>(-1.30; -0.02)</i> |
|                                      | All patients |                                | Non-vitamin K antagonist users |                                | Vitamin K antagonist users |                                |
|                                      | N            | Crude regression coefficient   | N                              | Crude regression coefficient   | N                          | Crude regression coefficient   |
| <b>Peritoneal dialysis</b>           | 31           | 0.0<br><i>(reference)</i>      | 31                             | 0.0<br><i>(reference)</i>      | 0                          | <i>n/a</i>                     |
| <b>Hemodialysis</b>                  | 82           | -0.26<br><i>(-0.57; 0.05)</i>  | 70                             | -0.07<br><i>(-0.35; 0.21)</i>  | 12                         | <i>n/a</i>                     |
