# Supplementary material for: The role of kidney transplantation and phosphate binder use in vitamin K status
Source: PubMed Central journal article supplement (PMC6117040; doi:10.1371/journal.pone.0203157), 2018-08-30
Supplement: pone.0203157.s003.pdf [file pone.0203157.s003.pdf]

|                                                              | All patients |                              | Non-vitamin K antagonist users |                              | Vitamin K antagonist users |                              |
|--------------------------------------------------------------|--------------|------------------------------|--------------------------------|------------------------------|----------------------------|------------------------------|
|                                                              | N            | Crude regression coefficient | N                              | Crude regression coefficient | N                          | Crude regression coefficient |
| <b>No phosphate binders</b>                                  | 24           | 0.0<br><i>(reference)</i>    | 22                             | 0.0<br><i>(reference)</i>    | 2                          | 0.0<br><i>(reference)</i>    |
| <b>Any phosphate binder</b>                                  | 89           | 0.26<br>(-0.08; 0.60)        | 79                             | 0.21<br>(-0.10; 0.53)        | 10                         | 0.32<br>(-0.37; 1.01)        |
| • <b>Exclusively non-calcium containing phosphate binder</b> | 53           | 0.23<br>(-0.10; 0.56)        | 50                             | 0.27<br>(-0.05; 0.60)        | 3                          | 0.07<br>(-0.57; 0.70)        |
| ○ <b>Sevelamer monotherapy</b>                               | 26           | 0.34<br>(-0.04; 0.72)        | 23                             | 0.34<br>(-0.03; 0.70)        | 3                          | 0.07<br>(-0.57; 0.70)        |
| • <b>Exclusively calcium containing phosphate binder</b>     | 10           | 0.42<br>(-0.12; 0.95)        | 8                              | 0.29<br>(-0.21; 0.79)        | 2                          | 0.21<br>(-2.92; 3.34)        |
